# Supplementary material for: Decoding the molecular mechanism of parthenocarpy in Musa spp. through protein–protein interaction network
Source: Sci Rep. 2021 Jul 16;11:14592. doi: 10.1038/s41598-021-93661-3 (PMC8285514; doi:10.1038/s41598-021-93661-3)
Supplement: Supplementary file 3 — Supplementary Material 1. [file 41598_2021_93661_MOESM3_ESM.xlsx]

## Sheet: Upregulated
Gene Name	Crop	Regulation	Mechanism of action	Pubmed ID	Reference
GA1	Citrus spp.	Upregulated	Gibberellin	27095396	Mesejo etal., 2016
CYCA1.1	Citrus spp.	Upregulated	Gibberellin	27095396	Mesejo etal., 2016
VOZ1 (vascular plant one zinc finger 1)	Citrus spp.,	Upregulated	Auxin (mutant study)	29507119	Kumar S etal., 2018
VOZ2 (NAC)	Citrus spp.,	Upregulated	Auxin (mutant study)	29507119	Kumar S etal., 2018
DELTA-OAT	Cucumis sativus L.,	Upregulated	Pollen germination and tube growth [86]; cellular amino acid biosynthetic process (GO:0008652)	29166853	Li et al., 2017
AGT2, ALANINE:GLYOXYLATE AMINOTRANSFERASE 2	Cucumis sativus L.	Upregulated	Responses to brassinosteroids; cellular amino acid biosynthetic process (GO:0008652)	29166853	Li et al., 2017
CER9, ECERIFERUM 9	Cucumis sativus L.	Upregulated	Seed Germination; pollen germination and tube growth [86]; Cell cycle [88]	29166853	Li et al., 2017
AT1G67120.1 MDN1, MIDASIN 1	Cucumis sativus L.	Upregulated	Seed germination and seedling development; female gametophyte development;	29166853	Li et al., 2017
EF1α, Elongation factor 1-alpha	Cucumis sativus L.	Upregulated	Cytokinin induced : Pollen development; translational elongation (GO:0006414)	29166853	Li et al., 2017
Csa2M070230 (CsWD40)	Cucumis sativus L.	Upregulated	Cytokinin responses	27553196	Wu et al., 2016
Csa2M070330 (CsPPR)	Cucumis sativus L.	Upregulated	Mitochondrial RNA editing	27553196	Wu et al., 2016
Csa2M073000 (CsHEXO3)	Cucumis sativus L.	Upregulated	cyanide biosynthesis	27553196	Wu et al., 2016
Csa5M160230.1	Cucumis sativus L.	Upregulated	Carbohydrate Metabolisms	24733865	Li et al., 2014
Csa6M000120.1	Cucumis sativus L.	Upregulated	Carbohydrate Metabolisms	24733865	Li et al., 2014
Csa6M421040.1	Cucumis sativus L.	Upregulated	Carbohydrate Metabolisms	24733865	Li et al., 2014
Csa7M213190.1	Cucumis sativus L.	Upregulated	Carbohydrate Metabolisms	24733865	Li et al., 2014
Csa7M213180.1	Cucumis sativus L.	Upregulated	Carbohydrate Metabolisms	24733865	Li et al., 2014
calcium-binding pollen allergen gene (Csa5M561760.1)	Cucumis sativus L.	Upregulated	pollen allergens	24733865	Li et al., 2014
flavin-containing monooxygenase yucca10	Eriobotrya japonica	Upregulated	Auxin biosynthesis	28066478	Jiang et al., 2016
CYP707A3 gene (ABA 8′-hydroxylase)	Eriobotrya japonica	Upregulated	For the rapid decrease in ABA level.	28066478	Jiang et al., 2016
ABA 8′-h	Ficus carica L	Upregulated	ABA	29859043	Chai et al., 2018
AUX/IAA	Ficus carica L	Upregulated	Auxin	29859043	Chai et al., 2018
PYL3	Litchi chinensis Sonn	Upregulated in Pollinated and parthenocarpy	_	28710486	Liu et al., 2017
ABF2	Litchi chinensis Sonn	Upregulated in Pollinated and parthenocarpy	_	28710486	Liu et al., 2017
bHLH25	Litchi chinensis Sonn	Upregulated	_	28710486	Liu et al., 2017
bHLH96	Litchi chinensis Sonn	Upregulated	_	28710486	Liu et al., 2017
KAO	Pear	Upregulation	GA	29423231	Liu et al., 2018
auxin efflux carrier component 6 (PIN2)	Pear	Upregulation	Auxin	29423231	Liu et al., 2018
U4-1-like cyclin	Pear	Upregulation	Cell cycle	29423231	Liu et al., 2018
G2/mitotic-specific cyclins	Pear	Upregulation	Cell cycle	29423231	Liu et al., 2018
two cyclin-dependent kinase (CDK	Pear	Upregulation	Cell cycle	29423231	Liu et al., 2018
expansin-A15	Pear	Upregulation	cell expansion	29423231	Liu et al., 2018
expansin-B3 like	Pear	Upregulation	cell expansion	29423231	Liu et al., 2018
expansin-A6	Pear	Upregulation	cell expansion	29423231	Liu et al., 2018
sucrose synthases	Pear	Upregulation	Sugar metabolism	29423231	Liu et al., 2018
sucrose hydrolases	Pear	Upregulation	Sugar metabolism	29423231	Liu et al., 2018
alpha amylases	Pear	Upregulation	Sugar metabolism		Liu et al., 2018
invertases	Pear	Upregulation	Sugar metabolism	29423231	Liu et al., 2018
UDP-glucose 4, 6-dehydratase	Pear	Upregulation	Sugar metabolism	29423231	Liu et al., 2018
UDP-glucose 6-dehydrogenase	Pear	Upregulation	Sugar metabolism	29423231	Liu et al., 2018
UDP-glucuronic acid decarboxylases	Pear	Upregulation	Sugar metabolism	29423231	Liu et al., 2018
GA3ox	Pear,Tomato	Upregulation	Gibberellin	29423231	Liu et al., 2018
(CPS) ent-copalyldiphosphate synthase	Pear,Tomato	Upregulation	GA	29423231	Liu et al., 2018
GA20ox2	Pear,Tomato,A. thaliana	Upregulation	Gibberellin	30203555	Cong et al., 2019
calmodulin-binding transcription activator 1 (CAMTA1)	Solanum lycopersicum L.	Upregulated	_	26319515	Cong et al., 2019
SlTIR1_Solyc09g074520	Solanum lycopersicum L.	Upregulated	Auxin signaling/parthenocarpy (+)	Review
LeAGP-1_Solyc02g092790	Solanum lycopersicum L.	Upregulated	CK signaling?/fruit set (+)	Review
SlTPR1_Solyc07g006180	Solanum lycopersicum L.	Upregulated	Ethylene signaling/parthenocarpy (+)	Review
NOTABILIS/LeNCED1_Solyc07g056570	Solanum lycopersicum L.	Upregulated	ABA synthesis/fruit size (+)	Review
FLACCA_Solyc07g066480	Solanum lycopersicum L.	Upregulated	ABA synthesis/fruit size (+)	Review
cyclinA3	Solanum lycopersicum L.	Upregulated	Cell Division-Related Genes	19435935	Wang et al., 2009
Cyclinb	Solanum lycopersicum L.	Upregulated	Cell Division-Related Genes	19435935	Wang et al., 2009
cellulose synthases	Solanum lycopersicum L.	Upregulated	Cell Division-Related Genes	19435935	Wang et al., 2009
expansin 10	Solanum lycopersicum L.	Upregulated	Cell Division-Related Genes	19435935	Wang et al., 2009
extensins	Solanum lycopersicum L.	Upregulated	Cell Division-Related Genes	19435935	Wang et al., 2009
polygalacturonase	Solanum lycopersicum L.	Upregulated	Cell Division-Related Genes	19435935	Wang et al., 2009
Glucanases	Solanum lycopersicum L.	Upregulated	Cell Division-Related Genes	19435935	Wang et al., 2009
polygalacturonase inhibitor protein (PGIP1) gene	Solanum lycopersicum L.	Upregulated	Cell Division-Related Genes	19435935	Wang et al., 2009
SlSAUR1	Solanum lycopersicum L.	Upregulated	auxin up-regulated RNA gene	19036844	Lin et al., 2008
PBP1(2 calcium binding proteins)	Solanum melongena L.	Upregulated	_	28604820	Chen et al., 2017
E2FB	Solanum melongena L.	Upregulated	Auxin Modulated flower and fruit growth	28604820	Chen et al., 2017
AGAMOUS-like MADS-box	Solanum melongena L./Banana/Tobacco	Upregulation	_	28604820	Chen et al., 2017
MADS39	V. vinifera	Upregulated	_
MADS46	V. vinifera	Upregulated	_	_
Vitis Gretchen Hagen3.2 (VvGH3.2)	V. vinifera	Upregulated	Auxin responsive genes	24743886	Jung et al., 2014
VvGH3.3	V. vinifera	Upregulated	Auxin responsive genes	24743886	Jung et al., 2014
two histone methyltransferase genes (Csa1M275930.1, Csa3M881620.1)	Cucumis sativus L.	Upregulated	Chromosome organization	24733865	Li et al., 2014
one histone kinase gene (Csa3M895060.1)	Cucumis sativus L.	Upregulated	Chromosome organization	24733865	Li et al., 2014
EDA3 and EDA9 (Embryo sac Development Arrest 3 and 9; Csa4M285690.1, Csa3M199630.1	Cucumis sativus L.	Upregulated	Embryo sac development	24733865	Li et al., 2014
SYN3 (Sister Chromatid Cohesion 1 PROTEIN 3, Csa4M153290.1) and CTF7 (a DNA-directed DNA polymerase gene, Chromosome Transmission Fidelity 7, Csa3M781550.1)	Cucumis sativus L.	Upregulated	Chromosome synthesis	24733865	Li et al., 2014
E1 component subunits encoding genes (Csa1M435750.1, Csa6M095870.1) and dihydrolipoyllysine-residue acetyltransferase encoding genes (Csa5M608580.1, Csa7M284430.1).	Cucumis sativus L.	Upregulated	TCA Cycle	24733865	Li et al., 2014
ADP-glucose pyrophosphorylase (Csa7M030510.1) and galacturonosyltransferase (Csa1M179740.1)	Cucumis sativus L.	Upregulated	amino sugar and nucleotide sugar	24733865	Li et al., 2014
YUCCA	Eriobotrya japonica	Overexpression	Auxin	(Review paper) 29325151	Joldersma et al., 2018
VINST1	grape	Over expression	Male fertility - Pollen germination & pollen tube growth	21843947	Ingrosso et al., 2011

## Sheet: Downregulated
Gene Name	Crop	Regulation	Mechanism of action	Pubmed ID	Reference
AUCSIA	S. lycopersicum	Downregulation	Auxin,RNAi Gene silensing	18987210	Molesini et al., 2009
PIN-4	S. lycopersicum	Downregulation	Auxin,RNAi Gene silensing	25909657	Tang et al., 2015
Chalcone synthase	Tomato	Downregulation	Male fertility - Pollen germination & pollen tube growth,RNAi Generegulation	22145036	Mahajan et al., 2015
MET1	A. thaliana	Down regulation	Cytokinin/DNA methylation,RNAi	29325151	Joldersma et al., 2018
DEF	Elaeis guineensis,Pear,Tomato	Downregulation	Cytokinin/MADS box genes, Loss-of-funtion mutation	29325151 2786287 629423231	Joldersma et al., 2018 Klap et al., 2017 ; Liu et al., 2018
MEDEA	A. thaliana	Downregulation	Cytokinin/PRC2 histone methylation and Loss-of-function mutation	12815071	Köhler et al. (2003)
FIS2	A. thaliana	Downregulation	Cytokinin/PRC2 histone methylation, Loss-of-function mutation	29325151	Joldersma et al., 2018
FIE	A. thaliana	Downregulation	Cytokinin/PRC2 histone methylation, Loss-of-function mutation	29325151	Joldersma et al., 2018
MSI	A. thaliana	Downregulation	Cytokinin/PRC2 histone methylation,Loss-of-function mutation	29325151	Joldersma et al., 2018
FLS (Flavanoid Synthase)	Tobacco	Gene silencing	Male fertilty - Pollen germination,pollen tube growth, Gene silencing	22145036	Mahajan et al., 2015
PISTILLATA	Malus domesticus; Vinis vinifera	Downregulation	Cytokinin/MADS box genes, Gain and Loss-of-funtion mutation	30949190	Palumbo et al., 2019
DELLA/RGL2	Tomato,A. thaliana	Downregulation	Gibberellin signaling pathway	30104574	Shinozaki et al., 2018
GA2ox1	Pear,Tomato,Ficus carica L	Downregulation	Gibberellin signaling pathway	30203555	Cong et al., 2019
GA2ox2	Pear,Tomato	Downregulation	Gibberellin signaling pathway	30203555	Cong et al., 2019
APETALA3 (TAP3)	Tomato	Downregulation	Gibberellin,RNAi; Loss-of-function mutations	30192961	Okabe et al., 2019
ARF7	Tomato	Downregulation	Gibberellin;Auxin signaling	30192961	Okabe et al., 2019
Procera - 2(Pro)	Tomato	Downregulation	Gibberellin, mutation study	30104574	Shinozaki et al., 2018
IAA9	Tomato	Downregulation	Auxin signaling	30008445	Hu et al., 2018
GAMYB	Vitis vinifera, Tomato	Downregulation	Gibberellin signaling pathway, RNAi, gene Silencing	29905866	Wang et al., 2018
BAS1	Ficus carica L	Downregulation	Gibberellin signaling pathway	29859043	Chai et al., 2018
NCED 1	Pear, Ficus carica L,Litchi(upregulated)	Downregulation	Gibberellin/ABA related	29859043	Chai et al., 2018
ACO/ACO3/ACO2	Ficus carica L,Apple	Downregulation	Gibberellin/Ethylene	29859043	Chai et al., 2018
Pat-k/AGL6	Tomato	Downregulation	Gibberellin signaling pathway	29699487	Takisawa et al., 2018
GID1	Pear	Downregulation	Gibberellin signaling pathway	29423233	Wang et al., 2018
ARF5	Pear	Downregulation	Auxin signaling pathway	29423235	Qi et al., 2018
ARF6	Pear	Downregulation	Auxin signaling pathway	29423236	Zhu et al., 2018
ARF18	Pear	Downregulation	Auxin signaling pathway	29423237	Shen et al., 2018
ARF19	Pear	Downregulation	Auxin signaling pathway	29423238	Jibran et al., 2018
AGL19(MADS)	Pear	Downregulation	TFs	29423251	Tangtiphaiboontana et al., 2017
AGL9(MADS)	Pear	Downregulation	TFs	29423251	Tangtiphaiboontana et al., 2017
TM6(MADS-B class genes)	Tomato	Downregulation	Petals & Stamen development	24659487	Quinet et al., 2014
GLO1	Tomato	Downregulation	MADS box genes	24659487	Quinet et al., 2014
GLO2	Tomato	Downregulation	MADS box genes	24659487	Quinet et al., 2015
tap3/sl	Tomato	Downregulation	MADS box genes, Loss-of-function mutations, Mutant study	30192961	Okabe et al., 2019
Mdpi	Tomato	Downregulation	MADS box genes,Mutant study	30192961	Okabe et al., 2019
hydra/spl	Tomato	Downregulation	MADS box genes, Gibberellin	28134991, 30192961	Okabe et al., 2019 Rojas‐Gracia et al., 2017
ses/spl	Tomato	Downregulation	MADS box genes, Gibberellin, Mutant study	30192961	Okabe et al., 2019
AG1	Tomato	Downregulation	MADS box genes, Gibberellin, Mutant study		Vivian-Smith et al., 2000
Cinnamoyl CoA reductase-like protein	Cucumis sativus L.	Downregulation	Seed development; lignin biosynthetic pathway	29166853	Li et al., 2017
COL homolog (Sme2.5_04102.1_g00005.1)	Solanum melongena L.	Downregulation	The nuclear protein CONSTANS (CO) is a TF that plays a central role in promoting the photoperiodic flowering in Arabidopsis by mediating the expression of downstream genes FT (FLOWERING LOCUS T) and SOC1 (SUPPRESSOR OF OVEREXPRESSION OF CO 1) [66]. Whereas many members in the CONSTANS-LIKE (COL) gene family, like COL9 in Arabidopsis and OsCO3 in rice, regulate flowering time negatively by repress…	28604820	Chen et al., 2017
WRKY genes(11 in no)	Litchi chinensis Sonn	Downregulated	Auxin and Gibbrillin signaling pathway	28710486	Liu et al., 2017
HSps	Litchi chinensis Sonn	Downregulated	Growth of pollen tube	28710486	Liu et al., 2017
ankyrin repeat subunit B(PP6-ARS-B)	Solanum melongena L.	Downregulated	Auxin (dephosphorylate PIN proteins)	28604820	Chen et al., 2017
CYP83B1	Solanum melongena L.	Downregulated	Auxin	28604820	Chen et al., 2017
indole-3-acetic acid-amido synthetase GH3.1	Solanum melongena L./Banana	Downregulated	Auxin responsive genes	28604820	Chen et al., 2017
serine/threonine-protein kinase SAPK2, similar to PKABA1	Solanum melongena L.	Downregulated	GA regulation	28604820	Chen et al., 2017
ACO	Eriobotrya japonica	Downregulated	Ethylene forming enzyme	28066478	Jiang et al., 2016
NAC7	Eriobotrya japonica	Downregulated	Ethylene forming enzyme	28066478	Jiang et al., 2016
NAC23	Eriobotrya japonica	Downregulated	Ethylene forming enzyme	28066478	Jiang et al., 2016
bHLH35, and	Eriobotrya japonica	Downregulated	Ethylene forming enzyme	28066478	Jiang et al., 2016
HD16,	Eriobotrya japonica	Downregulated	Ethylene forming enzyme	28066478	Jiang et al., 2016
Csa2M055050 (CsMDL)	Cucumis sativus L.	Downregulated	Cyanide biosynthetic process	27553196	Wu et al., 2016
Csa2M058620 (CsDJC77)	Cucumis sativus L.	Downregulated	Protein folding	27553196	Wu et al., 2016
Csa2M058620 (CsSMAX1)	Cucumis sativus L.	Downregulated	Protein metabolism	27553196	Wu et al., 2016
RIN	Solanum lycopersicum	Downregulated	Ethylene signaling pathway	26959229	Breitel et al., 2016
AP2	Solanum lycopersicum	Downregulated	Ethylene signaling pathway	26959229	Breitel et al., 2016
NOR	Solanum lycopersicum	Downregulated	Ethylene signaling pathway	26959229	Breitel et al., 2016
NR	Solanum lycopersicum	Downregulated	Ethylene signaling pathway	26959229	Breitel et al., 2016
ETHYLENE RESPONSE FACTOR E1 (ERF.E1)	Solanum lycopersicum	Downregulated	Ethylene signaling pathway	26959229	Breitel et al., 2016
COLORLESS NON-RIPENING	Solanum lycopersicum	Downregulated	Ethylene signaling pathway	26959229	Breitel et al., 2016
EMB	Arabidopsis thaliana	Downregulated	Seed development	18926486	Devic 2008
TT16	Arabidopsis thaliana	Downregulated	Seed coat development	12368498	Nesi et al., 2002
STM	Arabidopsis thaliana	Downregulated	Seed development	9011081	Endrizzi et al., 1996
CUC1 and CUC2	Arabidopsis thaliana	Downregulated	Seed development	25431125	Nwafor et al., 2014
ANT	Arabidopsis thaliana, grapevine	Downregulated	Seed development, mutation study	24659051	Sotelo-Silveira et al., 2014
SPATULA (SPT)	Arabidopsis thaliana,grapevine	Downregulated	Seed development	25431125	Nwafor et al., 2014
AGAMOUS (AG) MADS box genes	Arabidopsis thaliana,grapevine	Downregulated	Seed development	25431125	Nwafor et al., 2014
AG-SHATTERPROOF (SHP1 and SHP2)	Arabidopsis thaliana,grapevine	Downregulated	Seed development	25431125	Nwafor et al., 2014
SEEDSTICK (STK, also known as AGL11)	Arabidopsis thaliana,grapevine	Downregulated	Seed development	25431125	Nwafor et al., 2014
NOZZLE/SPOROCYTELESS (NZZ/SPL)	Arabidopsis thaliana,grapevine	Downregulated	Seed development	28134991	Rojas‐Gracia et al., 2017
EMBRYO-DEFECTIVE (EMB)	Arabidopsis thaliana,grapevine	Downregulated	embryo differentiation	25431125	Nwafor et al., 2014
INO	Arabidopsis thaliana	Downregulated	Seed development	24659051	Sotelo-Silveira et al., 2014
CRINKLY4 and BET1	Arabidopsis thaliana,grapevine	Downregulated	endosperm formation	25431125	Nwafor et al., 2014
LEAFY COTYLEDON (LEC)	Arabidopsis thaliana,grapevine	Downregulated	embryo differentiation	25431125	Nwafor et al., 2014
APETALA 2 (AP2)	Arabidopsis thaliana	Downregulated	seed coat development	25431125	Nwafor et al., 2014
BIG PETALp (BPEp)	Solanum lycopersicum L.	Downregulated	Flavonoid biosynthesis	26319515	Ruiu et al., 2015
CRABS CLAW (CRC)	Solanum lycopersicum L.	Downregulated	Flavonoid biosynthesis	26319515	Ruiu et al., 2015
AINTEGUMENTA (ANT)	Solanum lycopersicum L.	Downregulated	Flavonoid biosynthesis	26319515	Ruiu et al., 2015
APETALA3/DEFICIENS	Solanum lycopersicum L./Pear	Downregulated	Flavonoid biosynthesis	26319515	Ruiu et al., 2015
GIBBERELLIN INSENSITIVE DWARF1 (SlGID1)	Solanum lycopersicum L.	Downregulated	Flavonoid biosynthesis	26319515	Ruiu et al., 2015
bHLH96-like protein	Solanum lycopersicum L.	Downregulated	phenylpropanoid biosynthetic	26319515	Ruiu et al., 2015
WUSCHEL-like homeobox genes	Solanum lycopersicum L.	Downregulated	Flavonoid biosynthesis	26319515	Ruiu et al., 2015
STENOFOLIA (STF)	Solanum lycopersicum L.	Downregulated	Flavonoid biosynthesis	26319515	Ruiu et al., 2015
SlGATA9	Solanum lycopersicum L.	Downregulated	Flavonoid biosynthesis	26319515	Ruiu et al., 2015
SQUAMOSA PROMOTER-BINDING PROTEIN-LIKE 3 (SlSPL3,	Solanum lycopersicum L.	Downregulated	Flavonoid biosynthesis	26319515	Ruiu et al., 2015
SlYAB1a	Solanum lycopersicum L.	Downregulated	Auxin	26319515	Ruiu et al., 2015
r SlLAX2	Solanum lycopersicum L.	Downregulated	Auxin	26319515	Ruiu et al., 2015
ARF8	(Solanum melongena L	Downregulated	Auxin	26174736	Du et al., 2016
MADS28	V. vinifera	Downregulated	MADS-box	25429734	wang et al., 2015
MADS44	V. vinifera	Downregulated	MADS-box	25429734	wang et al., 2015
MADS45	V. vinifera	Downregulated	MADS-box	25429734	wang et al., 2015
(Soluble N-Ethylmaleimide-sensitive factor Adaptor Protein,Csa1M012100.1	cucumber	Downregulated	cytokinin	24733865	Li et al., 2014
An acidic endochitinase encoding gene (Csa5M139760.1	_	Downregulated	somatic embryo development	24733865	Li et al., 2014
AUCSIA1_Solyc10g054660	Solanum lycopersicum L.	Downregulated	Auxin signaling/parthenocarpy (−)	Review(23641176)	Ariizumi et al., 2013
AUCSIA2_Solyc01g110540	Solanum lycopersicum L.	Downregulated	Auxin signaling/parthenocarpy (−)	Review(23641176)	Ariizumi et al., 2013
CHS1_Solyc09g091510	Solanum lycopersicum L.	Downregulated	Flavonoid biosynthesis, auxin response?/parthenocarpy (−)	Review(23641176)	Ariizumi et al., 2013
CHS2_Solyc05g053550	Solanum lycopersicum L.	Downregulated	Flavonoid biosynthesis, auxin response?/parthenocarpy (−)	Review(23641176)	Ariizumi et al., 2013
PROCERA/SlDELLA_Solyc11g011260	Solanum lycopersicum L.	Downregulated	GA response/parthenocarpy (−)	Review(23641176)	Ariizumi et al., 2013
ERS1	Cucurbita pepo L.	Downregulated	Ethylene Expression receptor	24053311	Martinez et al., 2013
KNOX (LeT6 & LeT12)	Solanum lycopersicum L.	Downregulated	GA biosynthesis: specic expression in ovule	17503074	Olimpieri et al., 2007
CUC2	Solanum lycopersicum L.	Downregulated	GA biosynthesis: specic expression in ovule	17503074	Olimpieri et al., 2007
ETR1/ETR2/ETR5	Cucumber/Apple	Downregulated	Ethylene, Loss of function, sex determinetion	_	Wang et al., 2010
ANAC072, (NAC family proteins) ANAC102	Citrus spp.	Downregulated	Auxin/Chlorophyll degradation	32411503	Li et al., 2020
Litchi_GLEAN_10027104 (NAC)	Litchi chinensis Sonn	Down regulated	Auxin	28710486	Liu et al., 2017
Litchi_GLEAN_10042979 (NAC)	Litchi chinensis Sonn	Down regulated	Auxin	28710486	Liu et al., 2017
MYB44	Litchi chinensis Sonn	Down regulated	Auxin and Gibbrallin	28710486	Liu et al., 2017
MYB 108	Litchi chinensis Sonn	Down regulated	Auxin and Gibbrallin	28710486	Liu et al., 2017
TM29/SEP1	S. lycopersicum	Down regulated	MADS box genes,Antisense or co-suppression	12376628	Ampomah-Dwamena et al., 2002
ARF19 (Csa2M068680)	Cucumis sativus L.	Down regulated	Auxin	27553196	Wu et al., 2016
Csa2M070880 (CsEIN1)/EIN3	Cucumis sativus L./Apple	Down regulated	Ethylene signaling pathway)	27553196	Wu et al., 2016
GSMUA_Achr1P02650_001 -	Musa spp.	_	cell-wall-loosening, Pollen tube invasion	27144345	Sardos et al., 2016
GSMUA_Achr3P01350_001	Musa spp.	_	Floral development	27144345	Sardos et al., 2016
GSMUA_Achr3P22920_001	Musa spp.	_	Gametophyte development	27144345	Sardos et al., 2016
GSMUA_Achr4P07190_001	Musa spp.	_	Gibberellin signaling	27144345	Sardos et al., 2016
GSMUA_Achr4P07200_001	Musa spp.	_	ABA signaling; GAS signaling	27144345	Sardos et al., 2016
GSMUA_Achr4P07220_001	Musa spp.	_	Auxin signaling	27144345	Sardos et al., 2016
GSMUA_Achr4P07320_001	Musa spp.	_	Gibberellin signaling	27144345	Sardos et al., 2016
GSMUA_Achr4P07370_001	Musa spp.	_	Male and female gametophyte	27144345	Sardos et al., 2016
GSMUA_Achr5P15620_001	Musa spp.	_	Pollen tube growth development	27144345	Sardos et al., 2016
GSMUA_Achr7P18880_001	Musa spp.	_	ABA signaling	27144345	Sardos et al., 2016
GSMUA_Achr7P18930_001	Musa spp.	_	ABA signaling	27144345	Sardos et al., 2016
ACS3	Apple	_	Ethylene biosynthesis	15517996
P1	Banana & Apple	_	Auxin	_
EIL4	Banana	_	Ethylene	_
NAP	Solanum lycopersicum L.	_	GA	_
BOR3	Grape vine	_	GA	_
ABERRANT TESTA SHAPE		_	GA	_
BLH1	Solanum lycopersicum L.	_	Auxin	_
YABBY	Solanum lycopersicum L.	_	Auxin, MADS box	26319515	Ruiu et al., 2015

## Sheet: Agilent Literature search
Gene Name
mir164/mir164b
mir164/mir164c
Sox
Scr
Cbl
rd26
ics1
atmyc2
atnac3
anac019
atnye1/nye1
ataf1
Nam
avp1
arf6
agl15
ugt84a2
ap3
agl13
Lfy
agl19
Flc
hda9
Ft
dad2
agl20
agl66
ap1
ga5
iaa31
shy2
Phya
axr3
iaa1
Wus
Arl
abi5
zfp5
atmpk1
Sto
wnk2
ick6/krp3
rgl1
nac1
nced2
Eel
rgl2
atgid1a/gid1a
atgid1b/gid1b
ago1
rgl3
mir159/mir159b
atmyb33/myb33
brc1/tcp18
aao3
Nap
Spl
wrky45
sag12
sag13
mir319/mir319a

## Sheet: Homology Search
S.No	Gene Name	Blast E value	% of Identity	Banana genome ID	Reference Protein ID	Reference seq_annotation
1	DELTA-OAT, ORNITHINE-DELTAAMINOTRANSFERASE	0	0.74	Ma10_p28800.1	Csa1M025890.1	OAT_ARATH
2	AGT2, ALANINE:GLYOXYLATE AMINOTRANSFERASE 2	0	0.83	Ma10_p18940.1	Csa4G036590.1	AGT21_ARATH
3	CER9, ECERIFERUM 9	0	0.74	Ma03_p12820.1	Csa7G073540.1	SUD1_ARATH
4	AT1G67120.1 MDN1, MIDASIN 1	0	0.48	Ma04_p20500.1	Csa7G450640.1	MDN1_ARATH
5	EF1α, Elongation factor 1-alpha	0	0.96	Ma06_p05650.1	EF1A3_ARATH	EF1A3_ARATH
6	CsWD40 (Csa2M070230 )	4e-57	0.45	Ma04_p29630.1	Csa7G070230.1
7	Csa2M070330 (CsPPR)	0	0.6	Ma06_p00210.1	Csa2G070330.1	PP341_ARATH
8	Csa2M073000 (CsHEXO3)	0	0.57	Ma05_p30690.1	Csa2G073000.1	HEXO1_ARATH
9	Beta-fructofuranosidase 1	0	0.65	Ma05_p22250.1	Csa5G160230.1	INV1_ARATH
10	Csa6M000120.1	0	0.67	Ma08_p06080.1	Csa6G000120.1	PGLR4_ARATH
11	Endoglucanase 7	0	0.72	Ma08_p23290.1	Csa6G421040.1	GUN7_ARATH
12	1,4-alpha-glucan-branching enzyme 3	1e-137	0.66	Ma06_p15040.1	Csa7M213190.1	GLGB3_ARATH
13	1,4-alpha-glucan-branching enzyme 3	0	0.69	Ma06_p15040.2	Csa7M213180.1
14	calcium-binding pollen allergen gene	4e-55	0.48	Ma08_p29990.1	Csa5M561760.1
15	ABA 8′-h	0	0.75	Ma04_p28360.1	(comp16591_c0 )gi:587850113 / EXB40302.1	ABAH3_ARATH
16	PYL3	1e-68	0.4	Ma04_p15720.1	Litchi_GLEAN_10006449	SPEE1_AQUAE
17	bHLH25	2e-66	0.55	Ma08_p27190.1	Litchi_GLEAN_10019036	BH025_ARATH
18	ABF2	3e-128	0.51	Ma06_p32210.1	Litchi_GLEAN_10016358	RAF2B_ARATH
19	bHLH96	5e-78	0.53	Ma07_p12620.1	Litchi_GLEAN_10023126	BH096_ARATH
20	KAOs	0	0.52	Ma08_p31870.1	LOC103957280
21	auxin efflux carrier component 6	0	0.68	Ma08_p08070.1	LOC103951142
22	cyclin-dependent kinase (CDK)	0	0.82	Ma03_p03510.1	LOC103952922
23	expansin-A15	2e-138	0.77	Ma06_p12190.1	LOC103951053
24	expansin-A6	9e-170	0.84	Ma10_p22600.1	LOC103944903
25	sucrose synthases	0	0.76	Ma07_p21330.1	LOC103935320
26	sucrose hydrolases	0	0.65	Ma05_p22250.1	LOC103959831
27	alpha amylases	0	0.6	Ma08_p04100.1	LOC103950868
28	invertases	0	0.65	Ma05_p22250.1	LOC103961960
29	UDP-glucose 4, 6-dehydratase	0	0.85	Ma10_p14250.1	LOC103966239
30	UDP-glucose 6-dehydrogenase	0	0.9	Ma04_p03400.1	LOC103930880
31	UDP-glucuronic acid decarboxylases	0	0.9	Ma08_p21680.3	LOC103944949
32	GA20ox2	0	0.63	Ma08_p15080.1	LOC103960493
33	SlTIR1_Solyc09g074520	0	0.66	Ma03_p25110.1	Solyc09g074520
34	SlTPR1_Solyc07g006180	1e-103	0.7	Ma02_p03990.1	Solyc07g006180
35	NOTABILIS/LeNCED1_Solyc07g056570	0	0.68	Ma04_p29400.1	Solyc07g056570
36	FLACCA_Solyc07g066480	0	0.58	Ma08_p06800.1	Solyc07g066480
37	polygalacturonase	0	0.83	Ma06_p30000.1	SGN-U315768
38	SlSAUR1	0	0.88	Ma07_p13510.1		AUR1_ARATH
39	PBP1(2 calcium binding proteins)	2e-43	0.62	Ma11_p24260.1	Sme2.5_00989.1_g00006.1
40	Csa5M608580.1	0	0.72	Ma03_p07300.1
41	ADP-glucose pyrophosphorylase (Csa7M030510.1) and)	0	0.83	Ma01_p00130.1
42	galacturonosyltransferase (Csa1M179740.1	0	0.56	Ma07_p06220.1
43	YUCCA	7e-160	0.56	Ma03_p10630.1	CL64.Contig5_All	EMJ01134.1
44	stilbene synthase	0	0.74	Ma06_p12370.1		THS1_VITVI
45	Gibberellin-regulated GASA/GAST protein	9e-26	0.61	Ma07_p21450.1	Litchi_GLEAN_10014778	GASAE_ARATH
46	Nitrate reductase	0	0.69	>Ma09_p14900.1	Cit.22980.1.S1_s_at	AT1G37130.1(NIA2_ARATH)
47	LOX2 (LIPOXYGENASE 2)	0	0.58	Ma03_p11520.1	Cit.22219.1.S1_s_at	AT3G45140.1
48	PIN-4	0	0.65	Ma01_p17190.1	NP_001234184.1
49	MET1	2e-149	0.65	Ma05_p02760.1	MET1_ARATH
50	DEF	1e-144	0.85	Ma09_p21260.1	Q2NNC1_ELAGV
51	MEDEA	2e-123	0.5	Ma01_p17540.1	MEDEA_ARATH
52	FIS2	8e-33	0.46	Ma02_p13060.1	FIS2L_ARATH
53	FIE	0	0.72	Ma05_p28750.1	FIE_ARATH
54	MSI	0	0.88	Ma04_p38210.1	MSI1_ARATH
55	Flavanoid Synthase	7e-167	0.64	Ma03_p06970.1	ABE28017.1(genbank)
56	DELLA/RGL2	0	0.56	Ma08_p17700.1
57	GA2ox1	3e-141	0.56	Ma04_p15130.1	A7LCJ5_SOLTU
58	APETALA3 (TAP3)	8e-82	0.53	Ma09_p21260.1	Q0PXC1_SOLLC
59	ARF7	0	0.72	Ma09_p17570.1	AAG35177.1
60	IAA9	3e-111	0.54	Ma10_p15080.1	AEX00353.1
61	GAMYB	1e-158	0.47	Ma01_p10440.2	XP_015622336.1(Rice)
62	NCED 1	0	0.69	Ma05_p02500.1	comp17110_c0	EXC29339.1(96% similarity Hypothetical protein L484_021647 [Morus notabilis]
63	ACO/ACO3/ACO2	0	0.76	Ma07_p19730.1	comp11309_c0	EXC27244.1(97% similarity 1-Aminocyclopropane-1-carboxylate oxidase 3 [Morus notabilis]
64	GID1	0	0.69	Ma05_p29830.1	LOC103938790	XP_009347111.1
65	ARF5	0	0.69	Ma01_p13320.2	LOC103930094	XP_018498726.1
66	ARF6	0	0.66	Ma03_p24550.4	LOC103951320	XP_009360948.1
67	ARF18	0	0.69	Ma04_p18800.1	LOC103962541	XP_009373530.1
68	ARF19	0	0.6	Ma03_p05350.1	LOC103959396	XP_018505922.1
69	AGL19(MADS)	8e-73	0.56	Ma02_p06310.4	LOC103952886	XP_009362848.1
70	AGL9(MADS)	1e-129	0.73	Ma09_p01340.1	LOC103961438	XP_009372256.1
71	GLO1	0	0.9	Ma07_p07850.1		XP_010323620.1
72	hydra/spl	1e-11	0.55	Ma02_p17100.1	Solyc07g063670	NP_194463.1
73	Cinnamoyl CoA reductase-like protein	4e-111	0.44	Ma09_p06770.1		CAB87637.1
74	WRKY genes	2e-51	0.86	Ma08_p10530.1	AQP31370.1	A0A1S5VZH1_LITCN
75	Csa2M055050 (CsMDL)	8e-168	0.48	Ma03_p00730.1	Csa2G055050
76	Csa2M058620 (CsDJC77)	4e-155	0.74	Ma09_p05440.2	Csa2G058620
77	Csa2M058620 (CsSMAX1)	0	0.48	Ma07_p05200.1	Csa2G058640
78	AINTEGUMENTA (ANT)	0	0.55	Ma03_p31880.1	Solyc04g077490
79	bHLH96-like protein	5e-81	0.55	Ma10_p30230.1	Solyc01g098720
80	SQUAMOSA PROMOTER-BINDING PROTEIN-LIKE 3 (SlSPL3,	3e-48	0.71	Ma02_p04980.1	Solyc10g009080
81	SlYAB1a	1e-97	0.61	Ma08_p11330.1	Solyc01g091010
82	r SlLAX2	0	0.82	Ma05_p11160.1	Solyc01g111310
83	ETR1/ETR2/ETR5	0	0.77	Ma05_p00120.2	Csa_2G070880	ETR1_CUCSA
84	Gibberellin 2-beta-dioxygenase 8	7e-140	0.55	Ma05_p17150.1	Cit.26276.1.S1_at	AT4G21200.1
85	MYB 108	3e-87	0.88	Ma11_p14670.1	Litchi_GLEAN_10011587	MY108_ARATH
86	(CsEIN1)/EIN3	0	0.78	Ma05_p00120.2	Csa2M070880
87	GSMUA_Achr1P02650_001_Expansin-A1	NA	NA	Ma04_p22440.1	NA	NA
88	GSMUA_Achr3P22920_001_Histidine kinase CKI1	NA	NA	Ma03_p24090.1	NA	NA
89	GSMUA_Achr4P07200_001_C2H2-like zinc finger protein	NA	NA	Ma04_g07180	NA	NA
90	GSMUA_Achr4P07220_001_Indole-3-acetic acid-amido synthetase GH3.8	NA	NA	Ma04_p07200.1	NA	NA
91	GSMUA_Achr5P15620_001_Pectate lyase 15	NA	NA	Ma05_g15530	NA	NA
92	GSMUA_Achr7P18930_001_AP2/ERF transcription factor	NA	NA	Ma07_g20310	NA	NA
93	ACS3	0	0.76	Ma04_p37400.1	O24062_MALDO
94	NAP(NAC)	4e-92	0.58	Ma09_p04890.1	NP_564966.1	NAC29_ARATH
